# Supplementary material for: Implant Removal in the Management of Prosthetic Joint Infection by Staphylococcus aureus: Outcome and Predictors of Failure in a Large Retrospective Multicenter Study
Source: PubMed Central journal article supplement (PMC7911003; doi:10.3390/antibiotics10020118), 2021-01-26
Supplement: antibiotics-10-00118-s001.pdf [file antibiotics-10-00118-s001.pdf]

**Figure 1.** Standardized bias for covariates before and after propensity score matching for the evaluation of implant removal on mortality in cases with acute prosthetic joint infection by *Staphylococcus aureus* (A) and the role of rifampin on local failure in all cases managed with implant removal (B).

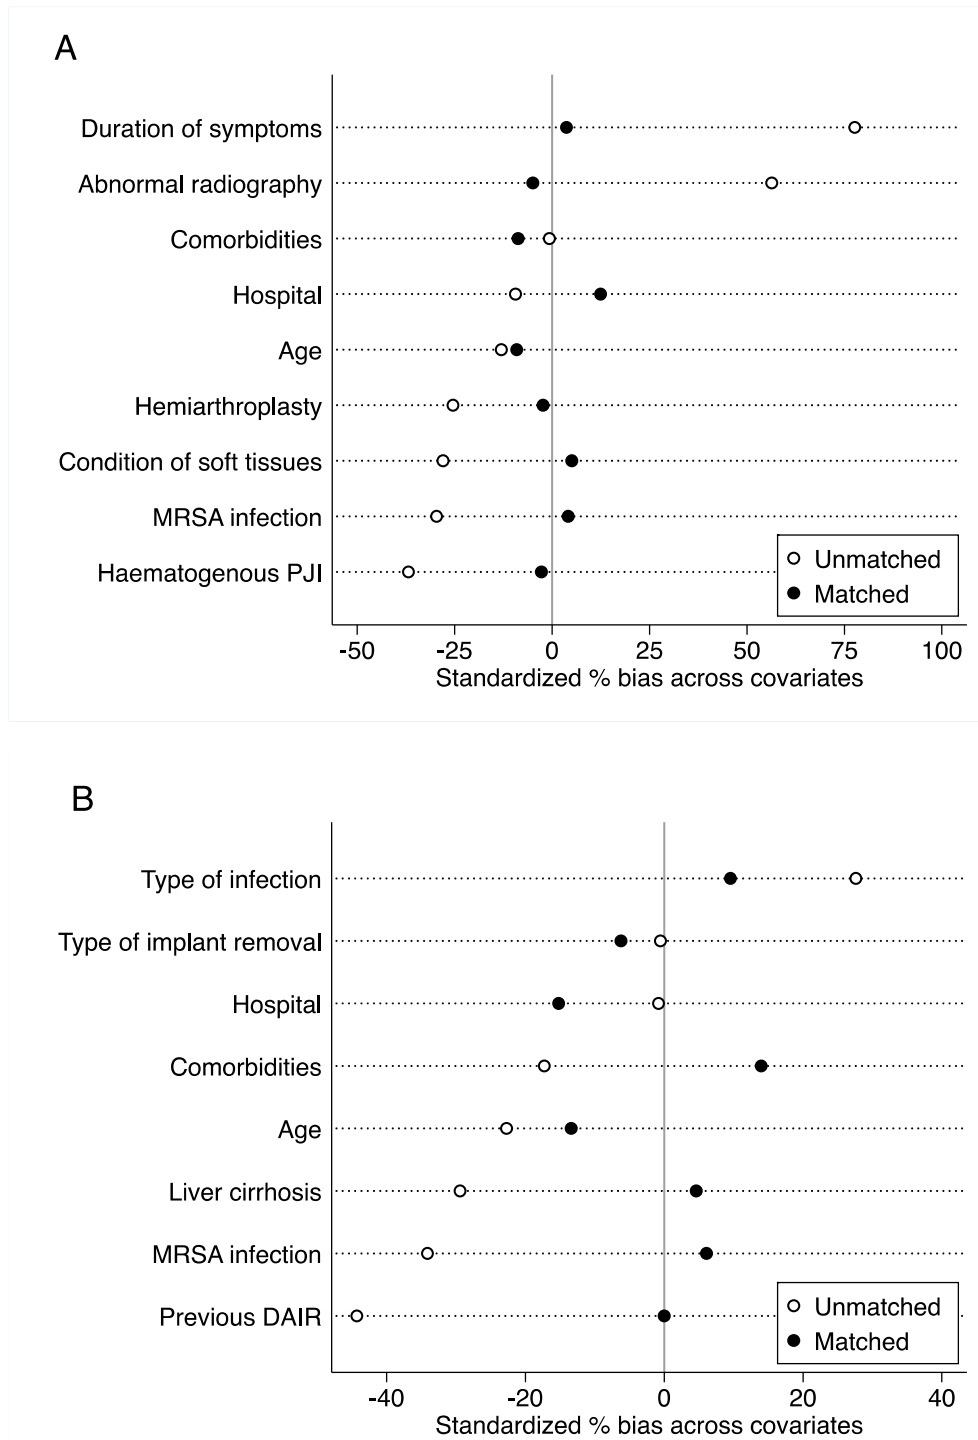

Abbreviations: MRSA: Methicillin-resistant *S. aureus*; DAIR: Debridement, antibiotics and implant retention.
